# Supplementary material for: Joint genetic analysis using variant sets reveals polygenic gene-context interactions
Source: PLOS journal article supplement (doi:10.1371/journal.pgen.1006693), 2017-04-20
Supplement: S3 (10.1371/journal.pgen.1006693.s003) [file journal.pgen.1006693.s003]

| Effect                                  | Function of parameters                | Variance explained |
|-----------------------------------------|---------------------------------------|--------------------|
| Region effect                           | $v_r$                                 | 2%                 |
| Shared relatedness effects              | $\alpha v_{bg}$                       | 24%                |
| Independent relatedness effects         | $(1 - \alpha)v_{bg}$                  | 16%                |
| Shared effects from hidden factors      | $\alpha\beta(1 - v_r - v_{bg})$       | 17.4%              |
| Independent effects from hidden factors | $(1 - \alpha)\beta(1 - v_r - v_{bg})$ | 11.6%              |
| IID noise                               | $(1 - \beta)(1 - v_r - v_{bg})$       | 29%                |

(a) Variance explained by the different simulated factors

| Parameter                                     |      |      |          |      |    |     |     |            |     |     |
|-----------------------------------------------|------|------|----------|------|----|-----|-----|------------|-----|-----|
| Number of causal variants                     | 1    | 2    | <b>4</b> | 8    | 12 | 20  | -   | -          | -   | -   |
| Proportionality factor<br>of the effect sizes | -0.5 | -0.3 | -0.2     | -0.1 | 0  | 0.1 | 0.2 | <b>0.3</b> | 0.5 | 0.7 |

(b) Parameter values for simulated rescaling-GxC effects‘

| Parameter                                          |         |          |          |          |        |              |               |               |               |       |
|----------------------------------------------------|---------|----------|----------|----------|--------|--------------|---------------|---------------|---------------|-------|
| Number of causal variants<br>(across contexts)     | 2       | <b>4</b> | 8        | 12       | 20     | -            | -             | -             | -             | -     |
| Region effect correlation<br>(extent of heter-GxC) | -1, -.8 | -.8, -.6 | -.6, -.4 | -.4, -.2 | -.2, 0 | <b>0, .2</b> | <b>.2, .4</b> | <b>.4, .6</b> | <b>.6, .8</b> | .8, 1 |

(c) Parameter values for general-GxC effects
