# Supplementary material for: Joint genetic analysis using variant sets reveals polygenic gene-context interactions
Source: PLOS journal article supplement (doi:10.1371/journal.pgen.1006693), 2017-04-20

## GxE test

## het-GxE test

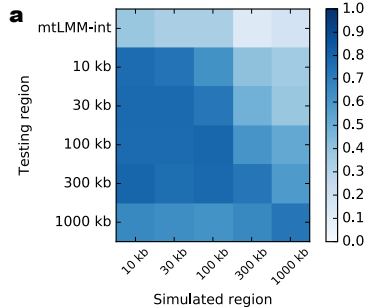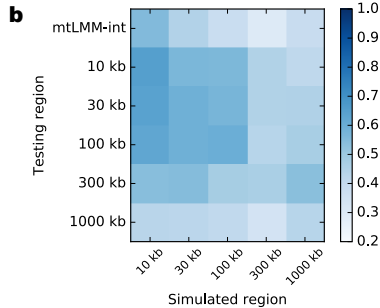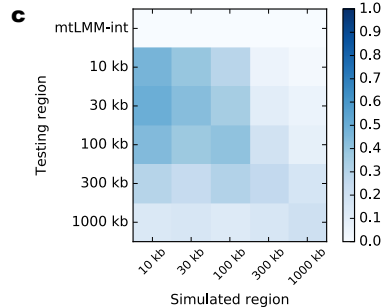

Supplement: S18 (10.1371/journal.pgen.1006693.s018) [file journal.pgen.1006693.s018]
