# Supplementary material for: Joint genetic analysis using variant sets reveals polygenic gene-context interactions
Source: PLOS journal article supplement (doi:10.1371/journal.pgen.1006693), 2017-04-20

**a**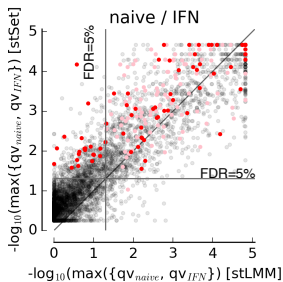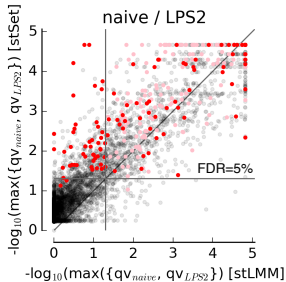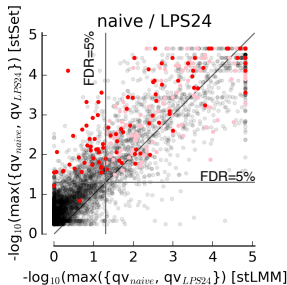

- Uninterpretable heterogeneity eQTLs using single-variant approach
- Interpretable heterogeneity eQTLs using single-variant approach

**b**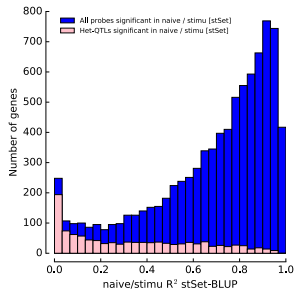**c**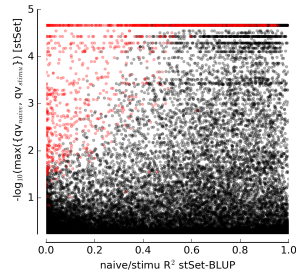

Supplement: S21 (10.1371/journal.pgen.1006693.s021) [file journal.pgen.1006693.s021]
